# Supplementary material for: Dietary fibers influence the intestinal SCFAs and plasma metabolites profiling in growing pigs
Source: Royal Society of Chemistry journal article supplement (doi:10.1039/c6fo01406b), 2016-01-01
Supplement: c6fo01406b1.pdf [file c6fo01406b1.pdf]

**Supplemental Table 1 Qualitative and quantitative analysis of plasma metabolites profiling of the CON, INU and MCC groups**

| NO. | Metabolites        | Concentration ( $\mu\text{g/ml}$ ) |                     |                     | Retention time (min) | KEGG   | HMDB      |
|-----|--------------------|------------------------------------|---------------------|---------------------|----------------------|--------|-----------|
|     |                    | CON                                | INU                 | MCC                 |                      |        |           |
| 1   | Lactate            | 406.37 $\pm$ 36.95                 | 638.361 $\pm$ 19.60 | 537.85 $\pm$ 65.90  | 4.95                 | C00186 | HMDB00190 |
| 2   | Alanine            | 70.08 $\pm$ 12.60                  | 50.61 $\pm$ 3.04    | 48.79 $\pm$ 2.62    | 5.76                 | C01401 | METPA0179 |
| 3   | Glycine            | 6.00 $\pm$ 0.98                    | 13.86 $\pm$ 6.74    | 15.84 $\pm$ 3.37    | 6.21                 | C00037 | HMDB00123 |
| 4   | Glycolic acid      | 265.96 $\pm$ 108.116               | 150.42 $\pm$ 7.28   | 207.96 $\pm$ 9.66   | 6.61                 | C00160 | HMDB00115 |
| 5   | Valine             | 69.4 $\pm$ 55.64                   | 65.83 $\pm$ 4.84    | 53.17 $\pm$ 1.95    | 8.26                 | C00183 | HMDB00883 |
| 6   | Urea               | 221.54 $\pm$ 90.52                 | 404.13 $\pm$ 57.55  | 344.59 $\pm$ 94.73  | 9.35                 | C00086 | HMDB00294 |
| 7   | Phosphoric acid    | 1004.28 $\pm$ 152.19               | 808.37 $\pm$ 73.68  | 1037.41 $\pm$ 97.48 | 9.78                 | C00009 | HMDB02142 |
| 8   | Isoleucine         | 8.45 $\pm$ 0.94                    | 34.45 $\pm$ 5.19    | 30.96 $\pm$ 1.97    | 10.16                | C16434 | HMDB33923 |
| 9   | Proline            | 46.63 $\pm$ 2.36                   | 7.10 $\pm$ 0.88     | 6.50 $\pm$ 0.74     | 10.23                | C00148 | HMDB00162 |
| 10  | Succinic acid      | 8.27 $\pm$ 0.78                    | 7.31 $\pm$ 0.69     | 6.50 $\pm$ 1.06     | 10.78                | C00042 | HMDB00254 |
| 11  | Glyceric acid      | 6.74 $\pm$ 1.29                    | 8.28 $\pm$ 0.85     | 7.60 $\pm$ 0.67     | 11.13                | -      | HMDB00139 |
| 12  | Methylmalonic acid | 13.89 $\pm$ 5.59                   | 4.76 $\pm$ 0.54     | 8.25 $\pm$ 1.44     | 11.67                | C02170 | HMDB00202 |
| 13  | Serine             | 35.68 $\pm$ 4.90                   | 45.08 $\pm$ 4.20    | 41.19 $\pm$ 1.98    | 11.86                | C00065 | HMDB00187 |
| 14  | Threonine          | 40.95 $\pm$ 7.88                   | 47.89 $\pm$ 8.95    | 63.42 $\pm$ 3.12    | 12.46                | C00188 | HMDB00167 |
| 15  | Aminomalonic acid  | 89.79 $\pm$ 6.44                   | 121.81 $\pm$ 12.60  | 131.05 $\pm$ 6.30   | 14.62                | C00872 | HMDB01147 |

|    |                                           |             |            |            |       |         |             |
|----|-------------------------------------------|-------------|------------|------------|-------|---------|-------------|
| 16 | Leucine                                   | 14.07±3.88  | 35.70±2.28 | 31.07±7.02 | 14.77 | C00123  | HMDB00687   |
| 17 | Malic acid                                | 7.06±0.64   | 4.42±1.10  | 2.28±0.40  | 15.13 | C00711  | HMDB00744   |
| 18 | Adipic acid                               | 3.79±1.21   | 6.03±1.64  | 9.57±0.59  | 15.61 | C06104  | HMDB00448   |
| 19 | 5-oxoproline                              | 59.55±18.72 | 48.45±7.77 | 96.50±5.70 | 15.88 | C01879  | HMDB00267   |
| 20 | Hydroxyproline                            | 57.41±12.87 | 39.29±9.21 | 5.35±0.87  | 15.93 | C001157 | HMDB00725   |
| 21 | 5-methoxyindole-3-acetic acid<br>(5-MIAA) | 23.67±6.71  | 42.92±7.06 | 64.65±3.62 | 16.23 | -       | HMDB04096 - |
| 22 | Threonic acid                             | 22.83±7.38  | 23.58±4.16 | 22.74±2.03 | 16.35 | C05283  | HMDB11738   |
| 23 | Cysteine                                  | 26.93±1.54  | 6.30±1.75  | 6.97±1.22  | 16.78 | C00791  | METPA0075   |
| 24 | Creatinine                                | n.d         | 3.31±0.69  | 7.96±0.34  | 16.73 | C00736  | HMDB00562   |
| 25 | Phenylalanine                             | 52.42±8.00  | 25.46±5.38 | 25.39±1.76 | 18.25 | C00079  | HMDB00159   |
| 26 | Dodecanoic acid                           | 7.93±3.51   | 3.87±0.63  | 11.71±4.47 | 18.95 | C02679  | HMDB00638   |
| 27 | Glycerophosphoric acid                    | 36.87±5.43  | 33.18±5.90 | 33.29±3.39 | 21.26 | C00093  | HMDB00126   |
| 28 | N-acetyl aspartate                        | 17.72±4.27  | 18.64±1.41 | 19.51±2.88 | 21.76 | C00365  | HMDB01409   |
| 29 | Azelaic acid                              | 27.07±6.17  | 8.43±2.45  | 28.36±5.46 | 22.06 | C08261  | HMDB00784   |
| 30 | Ornithine                                 | 6.12±0.90   | n.d        | n.d        | 22.41 | C00077  | HMDB00214   |
| 31 | Citric acid                               | 83.29±10.77 | 69.74±5.71 | 75.74±4.86 | 22.56 | C00158  | HMDB00094   |

|    |                    |               |               |                |             |        |             |
|----|--------------------|---------------|---------------|----------------|-------------|--------|-------------|
| 32 | Galactofuranose    | 142.0±85.03   | 91.87±18.83   | 54.27±21.21    | 23.01       | -      | HMDB07704   |
| 33 | Deoxy glucose      | 61.35±19.27   | 34.36±1.77    | 58.60±10.07    | 23.18       | -      | HMDB01514 - |
| 34 | Myristic acid      | 17.15±4.49    | 18.18±5.00    | 33.85±1.42     | 23.23       | C06424 | HMDB00806   |
| 35 | Fructose           | 7.15±1.17     | 7.78±0.98     | 8.18±1.60      | 23.47       | C02336 | HMDB00660   |
| 36 | Glucose            | 1593.54±52.01 | 1607.30±55.88 | 1778.18±37.28  | 23.70+24.03 | C00031 | HMDB00122   |
| 37 | Galactose          | 391.73±17.11  | 429.78±23.32  | 463.94±12.95   | 24.25       | C00984 | HMDB00143   |
| 38 | Erythrose          | 15.19±4.05    | 46.32±6.11    | 45.39±5.70     | 24.65       | C01301 | HMDB02649 - |
| 39 | Myoinositol        | 857.90±68.88  | 956.83±104.85 | 1018.10±110.14 | 24.98+27.48 | -      | HMDB38067   |
| 40 | Pentadecanoic acid | 30.69±8.93    | 26.71±6.10    | 20.14±3.01     | 25.23       | C16537 | HMDB00826   |
| 41 | Turanose           | 5.96±1.27     | 3.51±1.82     | 2.78±0.97      | 25.28       | C19636 | HMDB11740   |
| 42 | Glucopyranose      | 462.67±82.67  | 319.06±56.28  | 406.22±42.49   | 25.80       | C07257 | HMDB14365   |
| 43 | Hypogeic acid      | 13.48±0.41    | 10.46±4.86    | 11.46±2.97     | 26.60       | -      | HMDB40326   |
| 44 | Palmitic acid      | 195.77±55.33  | 116.95±4.52   | 115.77±3.94    | 27.13       | C00249 | HMDB00220   |
| 45 | Heptadecanoic acid | 37.96±11.81   | 5.94±0.43     | 11.64±5.39     | 28.93       | -      | HMDB02259   |
| 46 | Linoleic acid      | 75.75±10.38   | 59.98±3.69    | 41.46±9.15     | 29.06       | -      | HMDB38601   |
| 47 | Octadecanoic acid  | 138.74±85.02  | 2.38±0.34     | 3.34±0.14      | 30.22       | C01530 | HMDB00827   |
| 48 | Oleic acid         | 293.65±38.42  | 217.76±12.97  | 167.18±31.75   | 30.76       | C00712 | HMDB00207   |

|    |                      |              |              |              |       |        |           |
|----|----------------------|--------------|--------------|--------------|-------|--------|-----------|
| 49 | Arachidonic acid     | 34.04±8.21   | 67.57±21.41  | 52.52±16.29  | 32.67 | C00219 | HMDB01043 |
| 50 | Diethylhexyl adipate | 8.57±2.48    | 5.48±2.24    | 2.98±0.72    | 33.11 | C14240 | HMDB40270 |
| 51 | Arachidic acid       | 5.36±2.25    | 4.13±1.79    | 7.60±2.71    | 33.91 | C06425 | HMDB02212 |
| 52 | Cholesterol          | 383.51±44.53 | 302.65±23.56 | 306.06±12.48 | 43.52 | C00187 | HMDB00067 |

data are presented as mean ± SD.
